# Supplementary material for: Exposure to the Chinese Famine in Early Life and the Risk of Metabolic Syndrome in Adulthood
Source: PubMed Central journal article supplement — Diabetes Care. 2011 Mar 21;34(4):1014–8. doi: 10.2337/dc10-2039 (PMC3064015; doi:10.2337/dc10-2039), 2011-03-21
Supplement: supp_dc10-2039v102039_DC102039SupplementaryData.pdf [file supp_dc10-2039v102039_DC102039SupplementaryData.pdf]

Supplementary Figure 1.

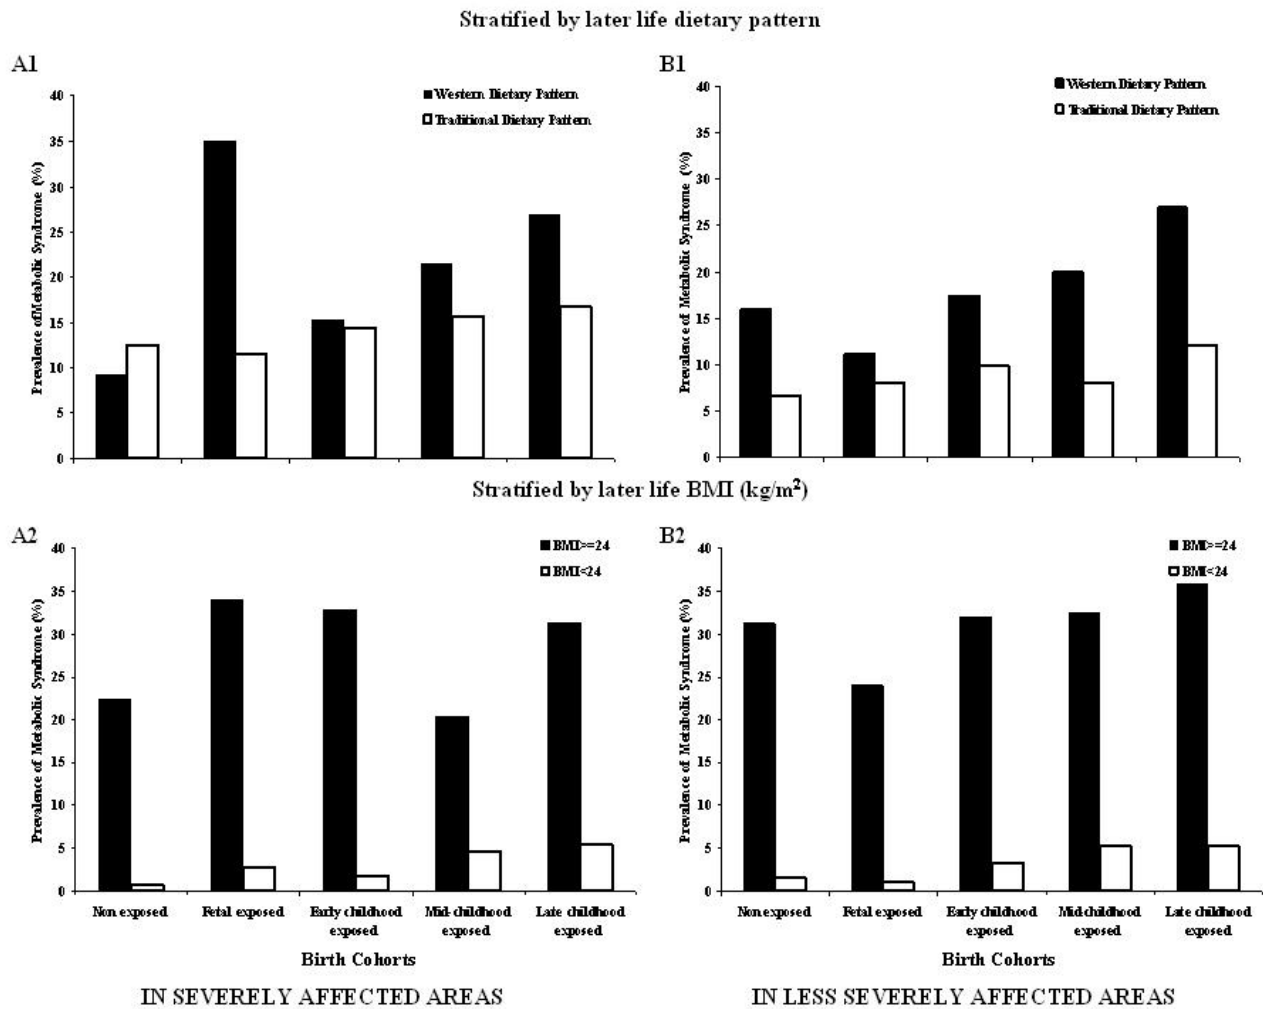

Sensitivity analysis 1: applying IDF waist circumference cutoffs for Chinese (Men ≥ 90 cm and Women ≥ 80 cm) to the definition of the metabolic syndrome – Prevalence of metabolic syndrome among birth cohorts according to early life famine exposure and later life dietary patterns (A1 & B1) and body mass index (BMI, A2 & B2) in severely (Column A) and less severely affected famine areas (Column B).

Supplementary Figure 2.

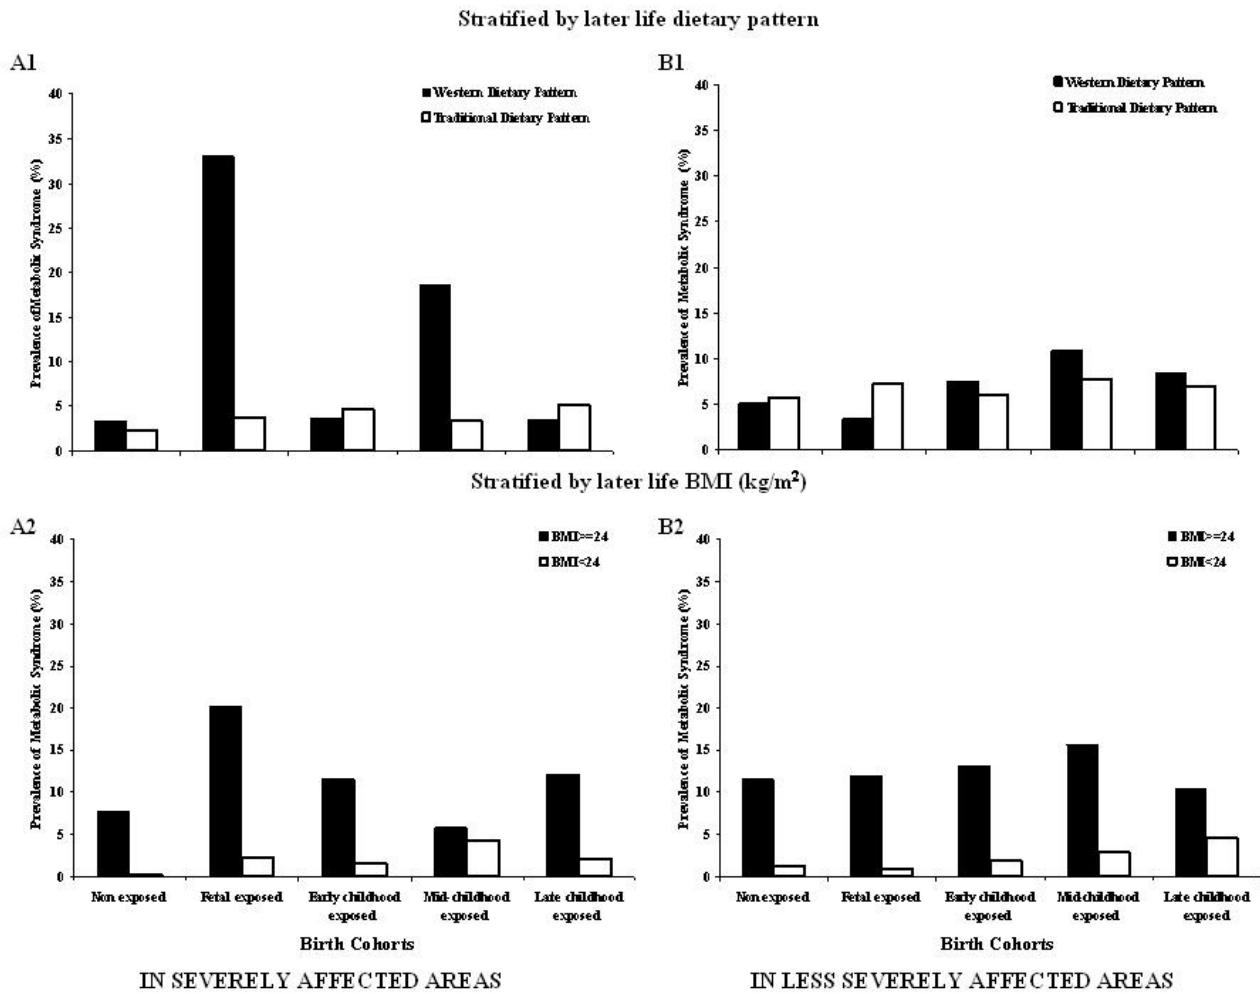

Sensitivity analysis 2: excluding abdominal obesity from the definition of the metabolic syndrome – Prevalence of metabolic syndrome among birth cohorts according to early life famine exposure and later life dietary patterns (A1 & B1) and body mass index (BMI, A2 & B2) in severely (Column A) and less severely affected famine areas (Column B)
